# Supplementary material
Source: PubMed Central journal article supplement (PMC7970097)
Supplement: ryct180018suppa1.pdf [file ryct180018suppa1.pdf]

**Table E1: Expanded Multivariable Cox models for cardiac death in subjects without and with diabetes.**

| Variables                                  | No diabetes |              |         | Diabetes |              |         |
|--------------------------------------------|-------------|--------------|---------|----------|--------------|---------|
|                                            | HR          | 95% CI       | P value | HR       | 95% CI       | P value |
| Age (10 years)                             | 2.06        | (1.67–2.54)  | <0.001  | 1.67     | (1.33–2.10)  | <0.001  |
| Female                                     | 0.45        | (0.27–0.75)  | <0.001  | 0.82     | (0.50–1.32)  | 0.41    |
| BMI                                        | 0.99        | (0.96–1.03)  | 0.74    | 0.97     | (0.93–1.01)  | 0.11    |
| HTN                                        | 1.04        | (0.66–1.65)  | 0.86    | 1.10     | (0.63–1.93)  | 0.73    |
| High cholesterol                           | 0.49        | (0.31–0.76)  | <0.001  | 0.81     | (0.50–1.31)  | 0.39    |
| Smoking                                    | 1.41        | (0.84–2.34)  | 0.19    | 1.83     | (1.12–3.00)  | 0.02    |
| Symptoms                                   | 0.88        | (0.57–1.36)  | 0.56    | 0.64     | (0.41–1.01)  | 0.05    |
| Beta-blockers                              | 1.17        | (0.75–1.84)  | 0.48    | 1.03     | (0.64–1.67)  | 0.89    |
| Rest HR (10 bpm)                           | 1.54        | (1.33–1.78)  | <0.001  | 1.15     | (0.97–1.37)  | 0.11    |
| Prior PCI                                  | 1.28        | (0.74–2.22)  | 0.37    | 1.23     | (0.74–2.06)  | 0.43    |
| Prior CABG                                 | 1.17        | (0.69–1.97)  | 0.56    | 0.84     | (0.50–1.40)  | 0.49    |
| % Myocardium abnormal (Reference group 0%) |             |              |         |          |              |         |
| 0.1%–9.9%                                  | 1.82        | (0.95–3.48)  | 0.07    | 3.06     | (1.33–7.01)  | 0.01    |
| 10.0%–19.9%                                | 4.14        | (1.92–8.96)  | <0.001  | 5.40     | (2.22–13.18) | <0.001  |
| ≥20%                                       | 7.34        | (3.69–14.62) | <0.001  | 7.20     | (3.04–17.05) | <0.001  |

BMI = body mass index; HTN = hypertension; HR = heart rate; PCI = percutaneous coronary revascularization; CABG = coronary artery bypass grafting.

**Table E2: Reclassification measures associated with addition of MPI PET information in expanded multivariable models.**

| Model               | No diabetes |                   | Diabetes |                  |
|---------------------|-------------|-------------------|----------|------------------|
|                     | Clinical    | Clinical+PET      | Clinical | Clinical+PET     |
| Category based NRI* |             | 0.21 (-0.02–0.42) |          | 0.31 (0.11–0.57) |
| Continuous NRI      |             | 0.47 (0.19–0.80)  |          | 0.55 (0.32–0.84) |
| $\chi^2$            | 142         | 181               | 58       | 87               |
| AIC                 | 1269        | 1236              | 1100     | 1078             |
| Harrell's C         | 0.825       | 0.862             | 0.737    | 0.781            |

\* Risk categories for NRI: < 1%, 1%–5%, 5%–10% and ≥ 10% at 2 years.

Variables in expanded clinical model: Age, gender, BMI, hypertension, high cholesterol, smoking, symptoms, resting heart rate, beta-blockers, prior PCI and prior CABG.
